# Supplementary material for: Imaging the distribution of an antibody-drug conjugate constituent targeting mesothelin with 89Zr and IRDye 800CW in mice bearing human pancreatic tumor xenografts
Source: PubMed Central journal article supplement (PMC4747211; doi:10.18632/oncotarget.5877), 2015-10-29
Supplement: oncotarget-06-42081-s001.pdf [file oncotarget-06-42081-s001.pdf]

## SUPPLEMENTARY FIGURES AND TABLE

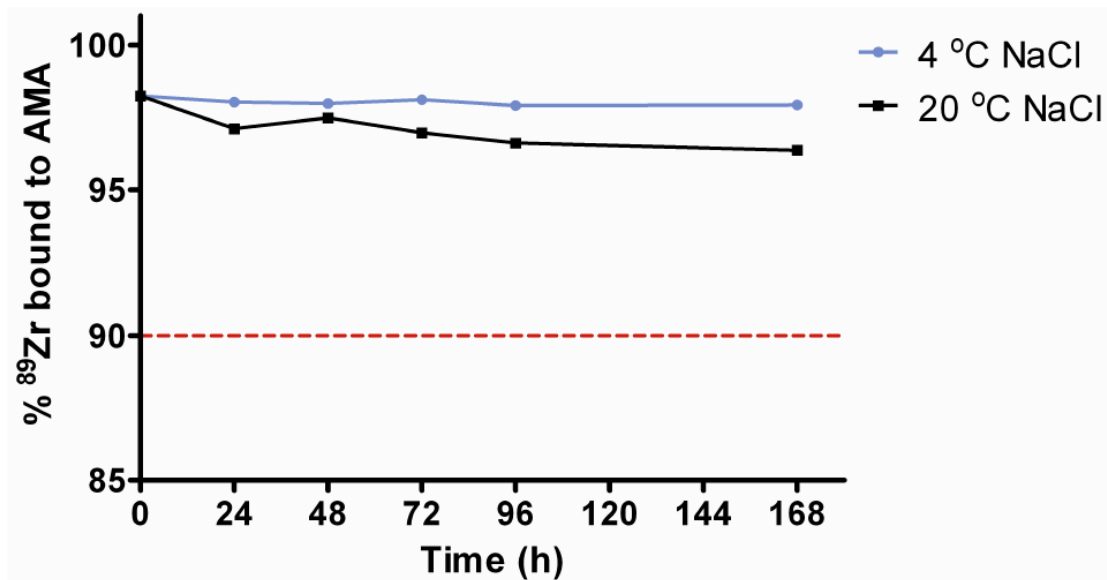

**Supplementary Figure S1: Stability testing of  $^{89}\text{Zr}$ -AMA.** Radiochemical purity was measured at 0, 24, 48, 72, 96, and 168 hours after labeling. A cutoff value of 90% of total  $^{89}\text{Zr}$  binding was considered the minimum; any lower would impair *in vivo* scanning and biodistribution, and thus this cutoff was also used to obtain representative *in vitro* data.

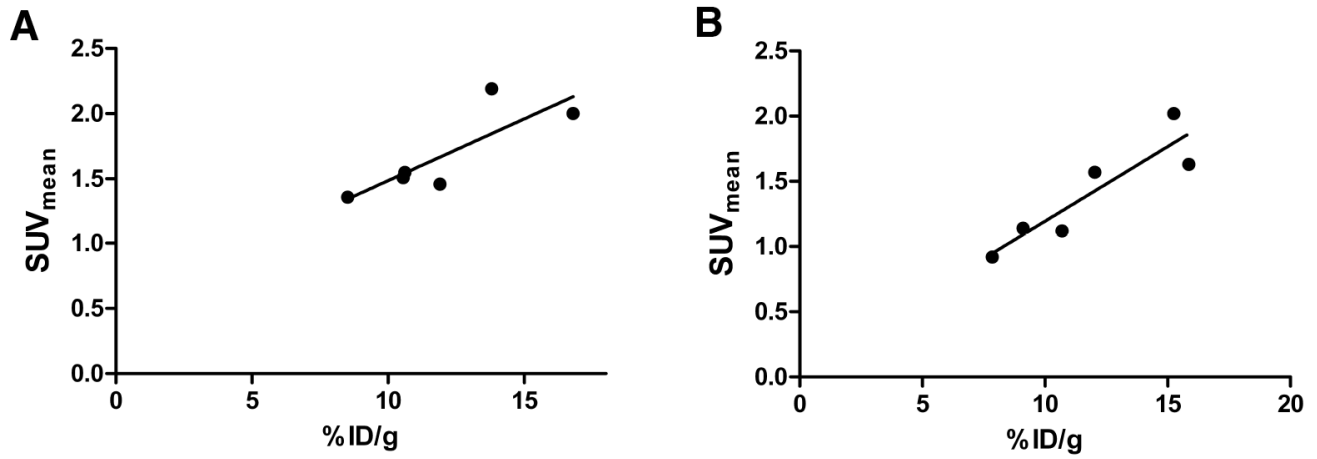

**Supplementary Figure S2: Correlation between SUV<sub>mean</sub> and %ID/g tumor.** A. HPAC tumors:  $R^2 = 0.68$ ,  $P < 0.05$  (linear regression). B. Capan-2 tumors:  $R^2 = 0.83$ ,  $P < 0.05$  (linear regression).

**Supplementary Table S1: Amount of radioactivity present (<sup>89</sup>Zr-AMA or <sup>111</sup>In-IgG) in organs of interest per injected dose**

| Tissue      | Uptake of <sup>89</sup> Zr (%ID/g) |            |           |            |            |            | Uptake of <sup>111</sup> In (%ID/g) |           |            |           |
|-------------|------------------------------------|------------|-----------|------------|------------|------------|-------------------------------------|-----------|------------|-----------|
|             | Dose escalation                    |            |           | Imaging    |            |            | Dose escalation                     |           | Imaging    |           |
|             | HPAC                               |            |           | HPAC       | CAPAN-2    |            | HPAC                                |           | HPAC       | CAPAN-2   |
|             | 10 µg                              | 25 µg      | 100 µg    | 10 µg      | 10 µg      | 10 µg      | 25 µg                               | 100 µg    | 10 µg      | 10 µg     |
| Heart       | 1.9 ± 0.5                          | 2.1 ± 0.2  | 1.9 ± 0.2 | 1.7 ± 0.4  | 2.0 ± 0.4  | 2.9 ± 0.9  | 3.0 ± 0.6                           | 3.0 ± 0.7 | 3.0 ± 0.5  | 2.6 ± 0.9 |
| Blood       | 4.7 ± 0.9                          | 4.7 ± 0.5  | 3.6 ± 1.3 | 4.6 ± 1.3  | 4.4 ± 1.8  | 11.1 ± 1.7 | 9.9 ± 1.5                           | 9.6 ± 2.6 | 10.0 ± 2.3 | 7.5 ± 3.0 |
| Lung        | 3.4 ± 0.5                          | 3.6 ± 0.5  | 2.6 ± 0.7 | 3.9 ± 0.9  | 3.9 ± 1.2  | 5.4 ± 1.5  | 5.2 ± 0.6                           | 4.8 ± 1.1 | 6.7 ± 1.8  | 4.6 ± 1.8 |
| Liver       | 5.0 ± 1.1                          | 3.8 ± 1.1  | 3.3 ± 0.6 | 5.1 ± 2.5  | 3.5 ± 0.9  | 4.9 ± 1.1  | 4.1 ± 1.5                           | 4.0 ± 1.0 | 6.0 ± 3.9  | 3.0 ± 0.9 |
| Gallbladder | 0.4 ± 0.6                          | 1.1 ± 0.7  | 1.6 ± 1.8 | 2.4 ± 1.6  | 0.9 ± 0.6  | 1.4 ± 0.9  | 1.6 ± 1.4                           | 3.1 ± 3.2 | 3.9 ± 2.4  | 1.3 ± 1.0 |
| Kidney      | 3.1 ± 0.4                          | 2.6 ± 0.2  | 2.1 ± 0.5 | 3.1 ± 0.7  | 2.7 ± 0.9  | 3.9 ± 0.8  | 3.2 ± 0.7                           | 3.3 ± 0.8 | 4.0 ± 0.9  | 2.8 ± 0.9 |
| Urine       | 0.9 ± 1.4                          | 0.9 ± 0.5  | 1.1 ± 0.3 | 1.2 ± 0.8  | 0.5 ± 0.3  | 2.3 ± 1.3  | 1.3 ± 0.9                           | 1.6 ± 0.6 | 1.9 ± 1.2  | 0.7 ± 0.4 |
| Bladder     | 2.2 ± 1.0                          | 2.5 ± 0.5  | 2.4 ± 0.4 | 2.3 ± 0.7  | 2.5 ± 0.7  | 2.9 ± 1.5  | 2.8 ± 0.5                           | 3.2 ± 0.5 | 2.8 ± 0.7  | 2.6 ± 0.9 |
| Stomach     | 1.1 ± 0.2                          | 0.9 ± 0.2  | 0.9 ± 0.1 | 0.8 ± 0.2  | 0.9 ± 0.2  | 1.2 ± 0.3  | 1.0 ± 0.2                           | 1.1 ± 0.2 | 1.1 ± 0.3  | 0.8 ± 0.2 |
| Pancreas    | 0.9 ± 0.2                          | 1.0 ± 0.1  | 0.8 ± 0.2 | 0.9 ± 0.2  | 0.9 ± 0.3  | 1.0 ± 0.2  | 1.0 ± 0.2                           | 0.9 ± 0.2 | 1.1 ± 0.3  | 0.9 ± 0.3 |
| Spleen      | 4.5 ± 1.3                          | 4.2 ± 0.4  | 3.1 ± 0.6 | 7.3 ± 2.9  | 4.5 ± 1.4  | 5.1 ± 1.8  | 4.3 ± 0.7                           | 3.7 ± 0.7 | 7.7 ± 3.5  | 3.5 ± 1.3 |
| Ilium       | 1.2 ± 0.4                          | 1.2 ± 0.3  | 1.1 ± 0.2 | 1.2 ± 0.3  | 1.6 ± 0.6  | 1.4 ± 0.6  | 1.4 ± 0.3                           | 1.5 ± 0.5 | 1.7 ± 0.4  | 1.3 ± 0.7 |
| Colon       | 1.0 ± 0.2                          | 1.1 ± 0.2  | 1.0 ± 0.3 | 0.9 ± 0.3  | 0.9 ± 0.2  | 1.4 ± 0.5  | 1.2 ± 0.2                           | 1.4 ± 0.4 | 1.4 ± 0.5  | 1.0 ± 0.3 |
| Muscle      | 1.1 ± 0.6                          | 0.8 ± 0.2  | 0.6 ± 0.2 | 0.8 ± 0.2  | 0.8 ± 0.2  | 1.0 ± 0.2  | 0.9 ± 0.1                           | 0.9 ± 0.2 | 0.9 ± 0.3  | 0.8 ± 0.2 |
| Bone        | 9.5 ± 2.0                          | 10.2 ± 3.0 | 6.8 ± 3.6 | 9.8 ± 3.2  | 6.3 ± 3.3  | 2.8 ± 1.3  | 2.9 ± 1.7                           | 1.8 ± 1.3 | 3.4 ± 0.8  | 1.1 ± 0.8 |
| Skin        | 3.9 ± 1.1                          | 3.4 ± 0.4  | 4.7 ± 1.1 | 4.3 ± 1.3  | 3.8 ± 0.6  | 3.4 ± 0.9  | 3.1 ± 0.4                           | 3.9 ± 0.5 | 4.1 ± 1.2  | 2.5 ± 0.5 |
| Brain       | 0.2 ± 0.1                          | 0.2 ± 0.1  | 0.2 ± 0.0 | 0.2 ± 0.1  | 0.1 ± 0.1  | 0.4 ± 0.1  | 0.5 ± 0.2                           | 0.4 ± 0.1 | 0.4 ± 0.2  | 0.2 ± 0.1 |
| Tumor       | 14.2 ± 2.5                         | 11.1 ± 0.6 | 7.5 ± 1.1 | 12.0 ± 2.9 | 11.8 ± 3.2 | 3.7 ± 0.7  | 4.4 ± 1.2                           | 5.1 ± 0.7 | 5.7 ± 1.4  | 3.7 ± 1.0 |

HPAC xenografts used in dose escalation, 10, 25 and 100 µg antibody injected, or imaging study with both HPAC and Capan-2 xenografts, 10 µg antibody injected. Data are presented as mean ± SD.
